# Supplementary material for: Growth inhibitory factor/metallothionein-3 is a sulfane sulfur-binding protein
Source: eLife. 2025 Nov 14;12:RP92120. doi: 10.7554/eLife.92120 (PMC12618007; doi:10.7554/eLife.92120)
Supplement: Figure 1—source data 1. [file elife-92120-fig1-data1.xlsx]

## Sheet: Figure 1
	ICP-MS	Zn data
		average	SD	n
	Zn7MT-3	7.40978	0.32733	3
	apo-MT-3	0	0	3
