# Supplementary material for: Growth inhibitory factor/metallothionein-3 is a sulfane sulfur-binding protein
Source: eLife. 2025 Nov 14;12:RP92120. doi: 10.7554/eLife.92120 (PMC12618007; doi:10.7554/eLife.92120)
Supplement: Figure 2—figure supplement 1—source data 1. [file elife-92120-fig2-figsupp1-data1.xlsx]

## Sheet: Figure 2-figure Supplement 1
	Figure 2-figure supplement 1E
	Raman Shift (cm^-1)	Zn7S20MT-3	ZnMT-3
	200	1.63453	0.991156
	201	1.64076	1.03514
	202	1.65958	1.089
	203	1.68894	1.15256
	204	1.72599	1.22477
	205	1.76663	1.30369
	206	1.80524	1.38658
	207	1.83526	1.47004
	208	1.85077	1.55039
	209	1.84861	1.62435
	210	1.82971	1.69003
	211	1.79891	1.74756
	212	1.76306	1.79892
	213	1.72891	1.84651
	214	1.70175	1.89137
	215	1.685	1.93191
	216	1.68077	1.96404
	217	1.68992	1.98266
	218	1.71354	1.98377
	219	1.75267	1.9657
	220	1.8083	1.92908
	221	1.88109	1.87585
	222	1.97074	1.80868
	223	2.0755	1.73077
	224	2.19157	1.64588
	225	2.31296	1.55807
	226	2.43215	1.47109
	227	2.54173	1.38782
	228	2.63669	1.30992
	229	2.71592	1.23792
	230	2.78181	1.17145
	231	2.83821	1.11005
	232	2.88824	1.05335
	233	2.93357	1.00145
	234	2.9753	0.954865
	235	3.01508	0.914449
	236	3.05529	0.881143
	237	3.09797	0.855793
	238	3.14348	0.839036
	239	3.19037	0.831454
	240	3.23648	0.832981
	241	3.28094	0.843864
	242	3.32515	0.864033
	243	3.37373	0.893194
	244	3.4335	0.930745
	245	3.51217	0.975676
	246	3.61666	1.0265
	247	3.75147	1.08115
	248	3.9174	1.13694
	249	4.11126	1.19051
	250	4.32653	1.23806
	251	4.55521	1.27596
	252	4.79021	1.30169
	253	5.02673	1.31458
	254	5.26157	1.31603
	255	5.49087	1.30883
	256	5.70801	1.29618
	257	5.90362	1.28108
	258	6.06783	1.26611
	259	6.1934	1.25352
	260	6.27771	1.24518
	261	6.32238	1.24259
	262	6.3305	1.24688
	263	6.30353	1.25804
	264	6.24014	1.27571
	265	6.13792	1.29833
	266	5.99619	1.32351
	267	5.818	1.34863
	268	5.61014	1.37166
	269	5.38239	1.39162
	270	5.14655	1.40834
	271	4.91526	1.42153
	272	4.70001	1.42999
	273	4.50901	1.43129
	274	4.34585	1.42254
	275	4.20953	1.40176
	276	4.09563	1.3691
	277	3.99816	1.32699
	278	3.91071	1.27929
	279	3.82904	1.22995
	280	3.75125	1.18217
	281	3.67805	1.13809
	282	3.61203	1.09888
	283	3.55653	1.06497
	284	3.51424	1.03643
	285	3.48701	1.01261
	286	3.47149	0.993252
	287	3.46439	0.977936
	288	3.45916	0.965995
	289	3.44833	0.956197
	290	3.42593	0.946649
	291	3.39008	0.935168
	292	3.34423	0.919984
	293	3.29629	0.900306
	294	3.25616	0.876362
	295	3.23305	0.848921
	296	3.23355	0.818757
	297	3.26077	0.786357
	298	3.31418	0.751899
	299	3.38999	0.71537
	300	3.48129	0.676778
	301	3.57966	0.636433
	302	3.67629	0.595127
	303	3.76392	0.554069
	304	3.83798	0.514579
	305	3.89678	0.477776
	306	3.94087	0.444398
	307	3.97263	0.414789
	308	3.99616	0.388985
	309	4.01746	0.366829
	310	4.04399	0.348464
	311	4.0832	0.332801
	312	4.14085	0.319941
	313	4.21638	0.309593
	314	4.30687	0.301475
	315	4.4001	0.29529
	316	4.48322	0.290732
	317	4.54134	0.28749
	318	4.56087	0.285295
	319	4.53064	0.283981
	320	4.44645	0.283543
	321	4.30933	0.28414
	322	4.12581	0.286053
	323	3.90613	0.289613
	324	3.66221	0.295145
	325	3.4061	0.30293
	326	3.14899	0.313185
	327	2.90065	0.326031
	328	2.66825	0.341436
	329	2.45716	0.359171
	330	2.26998	0.378762
	331	2.10748	0.399337
	332	1.96907	0.421374
	333	1.85346	0.440278
	334	1.75894	0.456998
	335	1.68412	0.47183
	336	1.62751	0.481184
	337	1.58808	0.484067
	338	1.56542	0.48589
	339	1.5576	0.484622
	340	1.56431	0.482205
	341	1.58466	0.483242
	342	1.61765	0.485872
	343	1.6598	0.492524
	344	1.70883	0.504703
	345	1.76157	0.523748
	346	1.81404	0.548719
	347	1.85786	0.580627
	348	1.88943	0.619534
	349	1.90232	0.665331
	350	1.89136	0.717531
	351	1.85525	0.775052
	352	1.79533	0.836687
	353	1.71614	0.898043
	354	1.62396	0.955762
	355	1.52575	1.00524
	356	1.4277	1.04233
	357	1.33447	1.0645
	358	1.24897	1.07129
	359	1.17254	1.06421
	360	1.10566	1.04562
	361	1.04804	1.01809
	362	0.998925	0.98333
	363	0.957666	0.942269
	364	0.923689	0.895268
	365	0.895632	0.842747
	366	0.873268	0.785653
	367	0.856033	0.725797
	368	0.843386	0.665408
	369	0.835048	0.606779
	370	0.830554	0.55169
	371	0.829246	0.501556
	372	0.830491	0.456457
	373	0.833577	0.416621
	374	0.837383	0.381699
	375	0.841529	0.352228
	376	0.844078	0.32587
	377	0.845223	0.302988
	378	0.84469	0.283162
	379	0.842429	0.265977
	380	0.838803	0.251019
	381	0.8343	0.238039
	382	0.829693	0.226805
	383	0.826166	0.217078
	384	0.823717	0.209286
	385	0.823578	0.202091
	386	0.825926	0.195942
	387	0.831214	0.190806
	388	0.839528	0.18661
	389	0.851003	0.183272
	390	0.865725	0.180802
	391	0.884	0.179083
	392	0.905862	0.178234
	393	0.931892	0.178266
	394	0.962098	0.179248
	395	0.997371	0.181134
	396	1.03828	0.184136
	397	1.08567	0.188255
	398	1.14028	0.193677
	399	1.20297	0.200493
	400	1.27469	0.208727
	401	1.35627	0.218657
	402	1.44834	0.230185
	403	1.55037	0.243159
	404	1.66075	0.257078
	405	1.77611	0.271456
	406	1.89094	0.285195
	407	1.99805	0.29706
	408	2.08985	0.305995
	409	2.15964	0.311659
	410	2.20299	0.314311
	411	2.21855	0.314943
	412	2.20697	0.315029
	413	2.17127	0.315784
	414	2.11684	0.318252
	415	2.05083	0.322768
	416	1.98061	0.329051
	417	1.91265	0.336363
	418	1.85286	0.343738
	419	1.8023	0.349744
	420	1.7632	0.353272
	421	1.73578	0.354147
	422	1.7198	0.352672
	423	1.71464	0.349493
	424	1.71953	0.345182
	425	1.73369	0.340018
	426	1.7569	0.33351
	427	1.78848	0.324914
	428	1.82838	0.31361
	429	1.87657	0.299497
	430	1.93268	0.283115
	431	1.99752	0.265447
	432	2.07116	0.247569
	433	2.15405	0.230065
	434	2.24718	0.214144
	435	2.35118	0.199792
	436	2.46708	0.187055
	437	2.59613	0.175938
	438	2.73977	0.16628
	439	2.9	0.157833
	440	3.07886	0.150613
	441	3.27891	0.144381
	442	3.50302	0.139001
	443	3.75508	0.134325
	444	4.03911	0.130317
	445	4.36015	0.126861
	446	4.72394	0.123886
	447	5.13712	0.121227
	448	5.60745	0.119001
	449	6.14266	0.117149
	450	6.75087	0.11563
	451	7.43891	0.114261
	452	8.21077	0.113216
	453	9.06503	0.11231
	454	9.99156	0.111698
	455	10.9699	0.111327
	456	11.9697	0.110958
	457	12.9572	0.110998
	458	13.9069	0.111013
	459	14.8136	0.111313
	460	15.6959	0.111736
	461	16.5907	0.112384
	462	17.5397	0.113112
	463	18.5756	0.114233
	464	19.7108	0.115391
	465	20.929	0.116826
	466	22.1791	0.118371
	467	23.3783	0.120241
	468	24.4238	0.122371
	469	25.2136	0.124659
	470	25.6674	0.127393
	471	25.7412	0.130483
	472	25.4338	0.133975
	473	24.7872	0.137923
	474	23.8779	0.142306
	475	22.7995	0.147374
	476	21.6416	0.153134
	477	20.4737	0.15927
	478	19.3424	0.166672
	479	18.2766	0.175267
	480	17.3005	0.18514
	481	16.4376	0.196503
	482	15.7107	0.209594
	483	15.137	0.224672
	484	14.7244	0.24199
	485	14.4728	0.261762
	486	14.3777	0.284093
	487	14.4346	0.30888
	488	14.6414	0.335684
	489	14.9958	0.363607
	490	15.4888	0.391106
	491	16.0959	0.416406
	492	16.7706	0.437273
	493	17.4409	0.452352
	494	18.0165	0.459746
	495	18.4022	0.458594
	496	18.5149	0.448811
	497	18.3008	0.431658
	498	17.745	0.40895
	499	16.8788	0.38295
	500	15.7718	0.35612
	501	14.5162	0.330108
	502	13.2068	0.306036
	503	11.9214	0.28447
	504	10.7139	0.265574
	505	9.61389	0.249267
	506	8.63247	0.235251
	507	7.7685	0.223435
	508	7.01401	0.213466
	509	6.35767	0.205054
	510	5.7876	0.198055
	511	5.29196	0.192236
	512	4.86018	0.187434
	513	4.48243	0.183511
	514	4.15011	0.180352
	515	3.856	0.177839
	516	3.59397	0.175878
	517	3.35926	0.174556
	518	3.14833	0.173655
	519	2.95861	0.173184
	520	2.78811	0.173108
	521	2.63518	0.173402
	522	2.49831	0.174044
	523	2.37607	0.175078
	524	2.26722	0.17638
	525	2.1704	0.178004
	526	2.08433	0.17989
	527	2.00778	0.182165
	528	1.93961	0.184721
	529	1.87831	0.187691
	530	1.82398	0.190707
	531	1.77519	0.194466
	532	1.73073	0.198628
	533	1.68889	0.203322
	534	1.64752	0.208561
	535	1.60436	0.214511
	536	1.55776	0.221054
	537	1.50714	0.228384
	538	1.45353	0.236185
	539	1.39835	0.245426
	540	1.34369	0.25581
	541	1.29119	0.267464
	542	1.24201	0.28024
	543	1.19677	0.294694
	544	1.15568	0.310361
	545	1.11871	0.327359
	546	1.08584	0.345368
	547	1.05657	0.363391
	548	1.03026	0.381298
	549	1.00789	0.398253
	550	0.988737	0.414415
	551	0.9727	0.430205
	552	0.959704	0.446281
	553	0.949681	0.463016
	554	0.942091	0.48047
	555	0.937996	0.497825
	556	0.935785	0.51356
	557	0.935178	0.525688
	558	0.935151	0.532358
	559	0.934365	0.532564
	560	0.93106	0.526584
	561	0.924628	0.515882
	562	0.914434	0.502549
	563	0.900699	0.488666
	564	0.884855	0.475884
	565	0.868088	0.465303
	566	0.851687	0.457508
	567	0.836602	0.452864
	568	0.82343	0.451433
	569	0.812478	0.453183
	570	0.803861	0.458193
	571	0.797582	0.466345
	572	0.793038	0.477828
	573	0.791119	0.492317
	574	0.791567	0.510361
	575	0.794192	0.531555
	576	0.799012	0.555529
	577	0.805469	0.581414
	578	0.814884	0.608029
	579	0.826754	0.633469
	580	0.840289	0.655364
	581	0.857774	0.67152
	582	0.878471	0.68051
	583	0.902527	0.682497
	584	0.93055	0.678806
	585	0.962637	0.671681
	586	1.00047	0.663492
	587	1.04428	0.65622
	588	1.09463	0.651033
	589	1.15182	0.649198
	590	1.21683	0.650893
	591	1.29033	0.656416
	592	1.37183	0.665801
	593	1.4606	0.679077
	594	1.5554	0.696249
	595	1.65464	0.716962
	596	1.75746	0.742013
	597	1.86353	0.770618
	598	1.97336	0.802422
	599	2.08795	0.836775
	600	2.20587	0.872012
	601	2.32202	0.906458
	602	2.42783	0.938077
	603	2.51236	0.965102
	604	2.56483	0.986751
	605	2.5792	1.00352
	606	2.55738	1.01707
	607	2.50795	1.0299
	608	2.44363	1.04375
	609	2.37725	1.06052
	610	2.31897	1.08144
	611	2.27631	1.10728
	612	2.2537	1.13837
	613	2.25255	1.17544
	614	2.27361	1.21861
	615	2.31647	1.26825
	616	2.3804	1.32478
	617	2.4648	1.38864
	618	2.56981	1.46064
	619	2.69679	1.54144
	620	2.84917	1.63188
	621	3.03093	1.73268
	622	3.24754	1.84475
	623	3.50608	1.96837
	624	3.8122	2.1033
	625	4.17183	2.24827
	626	4.58861	2.40073
	627	5.0644	2.55685
	628	5.59478	2.7123
	629	6.16746	2.86364
	630	6.76126	3.01015
	631	7.34256	3.15479
	632	7.86899	3.30389
	633	8.2944	3.46569
	634	8.57684	3.64879
	635	8.68697	3.86161
	636	8.61549	4.11075
	637	8.37425	4.40298
	638	7.99571	4.74544
	639	7.52643	5.14592
	640	7.01507	5.61257
	641	6.50542	6.15563
	642	6.03054	6.78661
	643	5.60944	7.51848
	644	5.25109	8.3652
	645	4.95753	9.3406
	646	4.72646	10.4565
	647	4.55518	11.7197
	648	4.44158	13.1279
	649	4.38406	14.6652
	650	4.38289	16.2985
	651	4.43837	17.9762
	652	4.55035	19.6299
	653	4.71749	21.1779
	654	4.93659	22.5323
	655	5.20231	23.6057
	656	5.50754	24.3209
	657	5.84497	24.6181
	658	6.20651	24.4665
	659	6.58581	23.8697
	660	6.97444	22.8733
	661	7.35922	21.5606
	662	7.71964	20.0389
	663	8.02716	18.4193
	664	8.24741	16.7979
	665	8.34621	15.2449
	666	8.29834	13.8059
	667	8.09608	12.5029
	668	7.75142	11.3409
	669	7.29568	10.3138
	670	6.77015	9.40546
	671	6.21853	8.59893
	672	5.67747	7.8715
	673	5.17421	7.21087
	674	4.72335	6.6096
	675	4.33109	6.06521
	676	3.99931	5.57712
	677	3.72432	5.14447
	678	3.5012	4.76616
	679	3.32311	4.43925
	680	3.18187	4.16036
	681	3.06815	3.92628
	682	2.97206	3.73366
	683	2.8845	3.57958
	684	2.79905	3.4615
	685	2.71349	3.37703
	686	2.62984	3.32362
	687	2.55283	3.29831
	688	2.48767	3.29718
	689	2.43801	3.3154
	690	2.40483	3.34722
	691	2.38553	3.38591
	692	2.37469	3.42348
	693	2.36463	3.45074
	694	2.34744	3.45821
	695	2.31742	3.43869
	696	2.27285	3.39015
	697	2.21611	3.31663
	698	2.1514	3.22665
	699	2.08226	3.12897
	700	2.00982	3.02889
	701	1.93297	2.92657
	702	1.84958	2.81786
	703	1.75866	2.69745
	704	1.66152	2.56136
	705	1.56157	2.41069
	706	1.4631	2.25075
	707	1.37	2.08817
	708	1.2853	1.93011
	709	1.20999	1.78171
	710	1.14497	1.64595
	711	1.08968	1.52399
	712	1.04358	1.41574
	713	1.00569	1.3204
	714	0.974781	1.23685
	715	0.949467	1.16391
	716	0.928318	1.10041
	717	0.910081	1.04529
	718	0.893958	0.997596
	719	0.879803	0.956403
	720	0.868109	0.920769
	721	0.859794	0.889644
	722	0.855925	0.861805
	723	0.857537	0.836192
	724	0.865565	0.811603
	725	0.880873	0.785499
	726	0.904312	0.758872
	727	0.936929	0.730321
	728	0.979318	0.701418
	729	1.03207	0.672742
	730	1.09681	0.645043
	731	1.17324	0.619246
	732	1.26053	0.595322
	733	1.35568	0.573593
	734	1.4544	0.554051
	735	1.54807	0.536743
	736	1.62643	0.521301
	737	1.67687	0.507613
	738	1.69036	0.495896
	739	1.66301	0.484511
	740	1.59951	0.473699
	741	1.50834	0.463272
	742	1.4018	0.453393
	743	1.2905	0.442872
	744	1.18325	0.432322
	745	1.0838	0.422346
	746	0.994576	0.412402
	747	0.916564	0.403107
	748	0.849449	0.394532
	749	0.792436	0.386945
	750	0.744567	0.380309
	751	0.704893	0.374644
	752	0.672568	0.369961
	753	0.646885	0.366272
	754	0.627277	0.363602
	755	0.613486	0.361987
	756	0.60519	0.361768
	757	0.602307	0.363096
	758	0.603431	0.365384
	759	0.609081	0.368935
	760	0.618452	0.373928
	761	0.630709	0.380845
	762	0.644604	0.389801
	763	0.658175	0.400849
	764	0.670993	0.414076
	765	0.681879	0.429765
	766	0.691474	0.447917
	767	0.70074	0.468371
	768	0.710718	0.490775
	769	0.721901	0.51461
	770	0.73389	0.539252
	771	0.745012	0.564016
	772	0.753132	0.588137
	773	0.75597	0.610704
	774	0.751923	0.63066
	775	0.740566	0.646975
	776	0.722706	0.658926
	777	0.699984	0.666293
	778	0.671149	0.669258
	779	0.644187	0.668036
	780	0.617213	0.662499
	781	0.591279	0.652096
	782	0.567053	0.636361
	783	0.544507	0.614569
	784	0.52614	0.587379
	785	0.511635	0.556045
	786	0.501408	0.522336
	787	0.495729	0.488252
	788	0.491458	0.45508
	789	0.494565	0.424167
	790	0.501163	0.395938
	791	0.514594	0.370714
	792	0.528215	0.348446
	793	0.548447	0.328932
	794	0.57079	0.311895
	795	0.595199	0.297041
	796	0.617576	0.284087
	797	0.635293	0.272778
	798	0.645644	0.262889
	799	0.647306	0.254228
