# Supplementary material for: Growth inhibitory factor/metallothionein-3 is a sulfane sulfur-binding protein
Source: eLife. 2025 Nov 14;12:RP92120. doi: 10.7554/eLife.92120 (PMC12618007; doi:10.7554/eLife.92120)
Supplement: Figure 2—source data 3. [file elife-92120-fig2-data3.xlsx]

## Sheet: Figure 2
Figure 2A
Raman Shift (cm^-1)	796.499	795.325	794.15	792.977	791.802	790.627	789.452	788.276	787.101	785.925	784.749	783.572	782.396	781.219	780.041	778.863	777.686	776.508	775.329	774.15	772.972	771.793	770.613	769.434	768.253	767.073	765.893	764.712	763.53	762.35	761.168	759.985	758.804	757.621	756.438	755.255	754.072	752.889	751.704	750.521	749.336	748.151	746.967	745.781	744.596	743.41	742.224	741.037	739.851
Zn7GIF/MT-3	1402.67	1364.1	1314.02	1339.87	1451.03	1613.85	1750.39	1873.46	2117.28	2458.5	2809.9	3154.12	3515.19	3857.2	4206.19	4579.9	4903.34	5146.2	5313.32	5401.06	5555.49	5641.32	5679.93	5879.06	6128.81	6464.46	6766.13	7021.05	7381.98	7725.68	8005.15	8273.55	8422.76	8520.45	8419.54	8152.71	7793.19	7408.98	6997.53	6543.1	5948.19	5362.39	4773.02	4291.89	3862.77	3372.49	2901.88	2465.57	2047.16
apo-GIF/MT-3	952.572	899.648	782.143	702.965	758.195	853.448	918.783	970.769	1076.23	1186.91	1469.35	1789.82	2131.52	2399.79	2517.46	2594.99	2771.41	2924.24	3009.38	2950.64	2955.18	2942.19	3036.24	3111.82	3226.5	3462.17	3783.96	4116.53	4428.23	4635.1	4886.89	5149.56	5355.09	5460.99	5362.21	5335.58	5114.68	4749.89	4296.08	3852.72	3461.04	3088.4	2607.42	2202.53	1757.04	1418.5	1127.16	876.14	716.837
HPE-IAM-treated GIF//MT-3	303.463	514.338	787.883	1135.07	1445.44	1758.66	1919.58	1986.06	2136.92	2327.96	2516.81	2638.91	2680.7	2717.79	2842.02	2903.46	2930.92	2810.46	2678.77	2583.08	2505.03	2421.85	2406.33	2362.68	2405.79	2398.09	2312.17	2398.72	2524.01	2552.02	2671.9	2637.71	2631.99	2660.36	2554.18	2434.55	2333.24	2130.58	2046.51	1859.24	1620.72	1390.44	1209.96	928.881	637.717	385.24	286.588	264.656	209.446
	Figure 2F
	Raman Shift (cm^-1)	apo-MT3_S4	apo-MT3_S2
	200	4.16307	4.68048
	201	4.1245	4.57425
	202	4.08665	4.46148
	203	4.05257	4.34636
	204	4.02972	4.23149
	205	4.028	4.1168
	206	4.05773	4.00059
	207	4.12814	3.882
	208	4.2465	3.76284
	209	4.41757	3.64779
	210	4.64285	3.54279
	211	4.91924	3.45299
	212	5.23693	3.38123
	213	5.577	3.32739
	214	5.90996	3.28855
	215	6.19766	3.25975
	216	6.40048	3.23539
	217	6.4892	3.2107
	218	6.45619	3.18278
	219	6.31896	3.1508
	220	6.11342	3.11564
	221	5.88151	3.07956
	222	5.65998	3.04593
	223	5.47445	3.0189
	224	5.33783	3.00269
	225	5.25112	3.00082
	226	5.20451	3.01561
	227	5.17886	3.04815
	228	5.14847	3.09841
	229	5.08651	3.16571
	230	4.97246	3.24935
	231	4.79882	3.3493
	232	4.57297	3.46665
	233	4.31317	3.60341
	234	4.04144	3.76165
	235	3.77753	3.94229
	236	3.53576	4.14362
	237	3.32481	4.35994
	238	3.14893	4.58064
	239	3.00946	4.79077
	240	2.90609	4.9739
	241	2.83752	5.11727
	242	2.8016	5.217
	243	2.79506	5.2802
	244	2.81288	5.32246
	245	2.84766	5.36242
	246	2.88941	5.41663
	247	2.92617	5.49689
	248	2.94586	5.60898
	249	2.93862	5.75433
	250	2.89863	5.93109
	251	2.82463	6.13722
	252	2.71969	6.37364
	253	2.59004	6.64623
	254	2.44412	6.96503
	255	2.29118	7.3406
	256	2.13973	7.77911
	257	1.99629	8.2772
	258	1.86497	8.81707
	259	1.74775	9.36225
	260	1.64498	9.85621
	261	1.55608	10.228
	262	1.47994	10.4083
	263	1.41527	10.3517
	264	1.36079	10.0551
	265	1.31534	9.55898
	266	1.2779	8.93123
	267	1.24759	8.2448
	268	1.22371	7.56033
	269	1.20569	6.91916
	270	1.19308	6.3443
	271	1.18556	5.84478
	272	1.18288	5.42041
	273	1.1849	5.06538
	274	1.19151	4.77067
	275	1.20262	4.52572
	276	1.21815	4.31985
	277	1.23791	4.14384
	278	1.2616	3.99137
	279	1.28875	3.85971
	280	1.31878	3.74923
	281	1.35113	3.66232
	282	1.38556	3.6014
	283	1.42234	3.56917
	284	1.46241	3.56776
	285	1.50716	3.59905
	286	1.55826	3.66499
	287	1.61746	3.76782
	288	1.68647	3.91028
	289	1.76701	4.09556
	290	1.86086	4.32719
	291	1.96995	4.60856
	292	2.09638	4.94212
	293	2.24238	5.32823
	294	2.41017	5.76356
	295	2.60169	6.23958
	296	2.81807	6.74171
	297	3.05896	7.24969
	298	3.32172	7.73902
	299	3.60074	8.18207
	300	3.88749	8.54838
	301	4.17151	8.80583
	302	4.44236	8.92649
	303	4.69147	8.8971
	304	4.91288	8.72816
	305	5.10234	8.45409
	306	5.25542	8.12329
	307	5.36596	7.78453
	308	5.42644	7.47711
	309	5.43099	7.22747
	310	5.38004	7.05052
	311	5.28357	6.95266
	312	5.16037	6.93429
	313	5.03349	6.99126
	314	4.925	7.11572
	315	4.85264	7.29736
	316	4.82902	7.52487
	317	4.86257	7.78635
	318	4.9589	8.06726
	319	5.12206	8.3461
	320	5.35508	8.59116
	321	5.65986	8.76277
	322	6.03613	8.82313
	323	6.47957	8.75053
	324	6.97912	8.5497
	325	7.51438	8.25126
	326	8.05452	7.90101
	327	8.56112	7.54607
	328	8.99619	7.22504
	329	9.33356	6.96442
	330	9.5675	6.77977
	331	9.71232	6.67902
	332	9.79218	6.66565
	333	9.82697	6.74087
	334	9.82259	6.90358
	335	9.77135	7.14894
	336	9.66079	7.4648
	337	9.48513	7.828
	338	9.25271	8.20116
	339	8.98524	8.53305
	340	8.71155	8.76547
	341	8.46109	8.84747
	342	8.2597	8.7522
	343	8.12816	8.48708
	344	8.08164	8.09072
	345	8.12937	7.61783
	346	8.2742	7.12339
	347	8.51163	6.65129
	348	8.82899	6.23068
	349	9.2046	5.87821
	350	9.60887	5.60144
	351	10.0069	5.40237
	352	10.3643	5.28015
	353	10.6546	5.23221
	354	10.8658	5.25492
	355	11.0037	5.3432
	356	11.0898	5.49016
	357	11.1524	5.68595
	358	11.2171	5.91841
	359	11.3009	6.17314
	360	11.4087	6.43532
	361	11.5343	6.69029
	362	11.6635	6.92101
	363	11.778	7.11013
	364	11.8588	7.23711
	365	11.892	7.28099
	366	11.868	7.22469
	367	11.781	7.06091
	368	11.6292	6.79599
	369	11.4149	6.44984
	370	11.1467	6.05141
	371	10.8363	5.63181
	372	10.4946	5.21785
	373	10.1296	4.82814
	374	9.74643	4.47113
	375	9.35133	4.15253
	376	8.95307	3.87035
	377	8.56244	3.62227
	378	8.19025	3.40535
	379	7.84388	3.21631
	380	7.52654	3.05098
	381	7.23489	2.90533
	382	6.96227	2.7759
	383	6.70334	2.66085
	384	6.45661	2.55959
	385	6.22653	2.47236
	386	6.02211	2.39957
	387	5.85375	2.34044
	388	5.73137	2.28711
	389	5.66349	2.2367
	390	5.6564	2.18373
	391	5.71514	2.12425
	392	5.84365	2.05725
	393	6.045	1.98672
	394	6.32098	1.90788
	395	6.67091	1.83878
	396	7.09009	1.77797
	397	7.56746	1.72848
	398	8.08448	1.6915
	399	8.61477	1.66691
	400	9.12751	1.65342
	401	9.59258	1.64916
	402	9.98598	1.65215
	403	10.2936	1.6615
	404	10.5141	1.67842
	405	10.6564	1.70324
	406	10.7351	1.73788
	407	10.7596	1.78503
	408	10.7242	1.83889
	409	10.6059	1.90983
	410	10.3732	1.98594
	411	10.0036	2.05778
	412	9.49807	2.11281
	413	8.88456	2.13788
	414	8.20885	2.12278
	415	7.51874	2.06543
	416	6.85359	1.97052
	417	6.23897	1.84898
	418	5.68804	1.71369
	419	5.20476	1.57572
	420	4.78751	1.4432
	421	4.43146	1.32078
	422	4.13075	1.21061
	423	3.87941	1.11295
	424	3.67266	1.02722
	425	3.50572	0.952287
	426	3.37489	0.886906
	427	3.27722	0.829825
	428	3.21036	0.779903
	429	3.17227	0.736131
	430	3.16087	0.697639
	431	3.1734	0.663691
	432	3.20572	0.633666
	433	3.25134	0.607041
	434	3.30163	0.583382
	435	3.34507	0.562326
	436	3.37087	0.543569
	437	3.37026	0.526859
	438	3.34177	0.511987
	439	3.28969	0.49878
	440	3.22337	0.487062
	441	3.15405	0.476771
	442	3.09193	0.467759
	443	3.04453	0.460036
	444	3.01676	0.453464
	445	3.01163	0.448083
	446	3.03098	0.443836
	447	3.07616	0.434598
	448	3.14824	0.432667
	449	3.24939	0.431253
	450	3.3815	0.431728
	451	3.54737	0.433497
	452	3.75031	0.436652
	453	3.99465	0.441279
	454	4.28433	0.446584
	455	4.62441	0.454729
	456	5.01791	0.464926
	457	5.46583	0.476817
	458	5.96476	0.491976
	459	6.50458	0.510165
	460	7.06668	0.531832
	461	7.62364	0.557515
	462	8.14611	0.587824
	463	8.60538	0.623435
	464	8.98319	0.665057
	465	9.27275	0.709664
	466	9.47411	0.765187
	467	9.58697	0.82834
	468	9.60837	0.898186
	469	9.53811	0.973782
	470	9.38597	1.05307
	471	9.17712	1.13347
	472	8.94941	1.21249
	473	8.74309	1.28857
	474	8.59313	1.36111
	475	8.52321	1.4297
	476	8.54539	1.49246
	477	8.66116	1.54469
	478	8.8636	1.57882
	479	9.13996	1.5868
	480	9.47462	1.56261
	481	9.85175	1.50561
	482	10.2576	1.42107
	483	10.6819	1.31818
	484	11.1183	1.19365
	485	11.5627	1.08265
	486	12.0106	0.977206
	487	12.4531	0.881186
	488	12.8733	0.795494
	489	13.247	0.720126
	490	13.5463	0.654077
	491	13.746	0.596979
	492	13.8281	0.546853
	493	13.7867	0.503834
	494	13.6295	0.466395
	495	13.3799	0.433645
	496	13.0735	0.405015
	497	12.7482	0.379714
	498	12.4328	0.357487
	499	12.1378	0.339194
	500	11.8532	0.321501
	501	11.5501	0.303619
	502	11.2068	0.289604
	503	10.7981	0.276997
	504	10.3172	0.265618
	505	9.77102	0.255316
	506	9.17422	0.245962
	507	8.5439	0.237444
	508	7.89748	0.229669
	509	7.25111	0.222554
	510	6.62023	0.216029
	511	6.01866	0.209846
	512	5.45708	0.204329
	513	4.94316	0.199243
	514	4.47941	0.194319
	515	4.06625	0.189981
	516	3.70054	0.185969
	517	3.37813	0.182256
	518	3.09428	0.178818
	519	2.84424	0.175635
	520	2.62359	0.171989
	521	2.42777	0.169267
	522	2.25445	0.166752
	523	2.10006	0.164431
	524	1.96189	0.162295
	525	1.83804	0.160333
	526	1.72651	0.15854
	527	1.62574	0.159452
	528	1.53438	0.158245
	529	1.4513	0.156946
	530	1.37552	0.156675
	531	1.3062	0.15568
	532	1.24263	0.155564
	533	1.18419	0.15504
	534	1.13033	0.154924
	535	1.0806	0.154541
	536	1.03458	0.154317
	537	0.98906	0.153943
	538	0.949479	0.154064
	539	0.912679	0.15437
	540	0.878423	0.154876
	541	0.8465	0.155364
	542	0.816728	0.156322
	543	0.788926	0.157537
	544	0.762994	0.159039
	545	0.73879	0.160862
	546	0.716193	0.163016
	547	0.695149	0.165609
	548	0.675569	0.168806
	549	0.657393	0.172406
	550	0.638894	0.176628
	551	0.623428	0.181398
	552	0.60925	0.187184
	553	0.596441	0.193951
	554	0.585049	0.201881
	555	0.575	0.211116
	556	0.567125	0.221923
	557	0.560514	0.234444
	558	0.555258	0.248738
	559	0.552855	0.265031
	560	0.553739	0.283253
	561	0.55636	0.30145
	562	0.55884	0.32163
	563	0.563334	0.340837
	564	0.5696	0.357122
	565	0.577274	0.368466
	566	0.58445	0.373085
	567	0.590977	0.370247
	568	0.592141	0.360838
	569	0.587449	0.346308
	570	0.577403	0.328874
	571	0.562886	0.310465
	572	0.543973	0.292828
	573	0.521349	0.276499
	574	0.499557	0.262288
	575	0.478154	0.249964
	576	0.457207	0.239717
	577	0.43751	0.231154
	578	0.421211	0.224498
	579	0.404998	0.219454
	580	0.390398	0.215814
	581	0.379	0.213501
	582	0.367133	0.212434
	583	0.35638	0.207314
	584	0.346596	0.208661
	585	0.337655	0.211208
	586	0.329447	0.215004
	587	0.32188	0.221708
	588	0.314875	0.228298
	589	0.308368	0.236484
	590	0.3023	0.246991
	591	0.296626	0.259407
	592	0.291305	0.273935
	593	0.287263	0.290221
	594	0.282556	0.309451
	595	0.278114	0.329824
	596	0.274128	0.351351
	597	0.270154	0.372728
	598	0.266388	0.391739
	599	0.262816	0.40763
	600	0.259425	0.416394
	601	0.256206	0.418522
	602	0.253088	0.411261
	603	0.250184	0.39758
	604	0.247427	0.380048
	605	0.24481	0.36021
	606	0.242328	0.340298
	607	0.239977	0.321563
	608	0.237752	0.304691
	609	0.235651	0.289953
	610	0.23367	0.277358
	611	0.231807	0.266775
	612	0.230061	0.258007
	613	0.228431	0.250845
	614	0.226916	0.245083
	615	0.225515	0.24054
	616	0.22423	0.237056
	617	0.223062	0.234497
	618	0.222011	0.23166
	619	0.22108	0.230636
	620	0.220273	0.230253
	621	0.219591	0.230449
	622	0.218647	0.231173
	623	0.217796	0.229028
	624	0.217528	0.230719
	625	0.217409	0.232843
	626	0.217022	0.235382
	627	0.217505	0.238327
	628	0.217892	0.24167
	629	0.218471	0.245409
	630	0.217849	0.249407
	631	0.218842	0.253953
	632	0.220107	0.258917
	633	0.221642	0.264314
	634	0.223476	0.270163
	635	0.225642	0.276489
	636	0.22818	0.28263
	637	0.231136	0.290005
	638	0.234566	0.29796
	639	0.238535	0.306541
	640	0.24312	0.315804
	641	0.248411	0.325811
	642	0.254516	0.336636
	643	0.261558	0.345417
	644	0.269681	0.357714
	645	0.279042	0.371581
	646	0.289809	0.386701
	647	0.302147	0.40323
	648	0.31514	0.421354
	649	0.330937	0.441288
	650	0.346345	0.463284
	651	0.365294	0.487636
	652	0.384692	0.514553
	653	0.403679	0.54467
	654	0.420969	0.578278
	655	0.435326	0.615811
	656	0.443923	0.657679
	657	0.450946	0.704197
	658	0.454718	0.755472
	659	0.457637	0.811254
	660	0.46074	0.870787
	661	0.464901	0.932157
	662	0.471667	0.991319
	663	0.48101	1.05287
	664	0.492982	1.11213
	665	0.507555	1.16897
	666	0.524838	1.22446
	667	0.54518	1.28075
	668	0.569106	1.34073
	669	0.597125	1.40774
	670	0.629507	1.48508
	671	0.665512	1.5756
	672	0.705872	1.68112
	673	0.748289	1.80205
	674	0.790927	1.9369
	675	0.834599	2.08198
	676	0.875744	2.23108
	677	0.911796	2.37546
	678	0.940856	2.5043
	679	0.961312	2.60589
	680	0.973655	2.67154
	681	0.978104	2.69865
	682	0.97567	2.68977
	683	0.967361	2.65652
	684	0.952781	2.61189
	685	0.936213	2.5698
	686	0.917175	2.53867
	687	0.89621	2.526
	688	0.874594	2.53426
	689	0.851108	2.56366
	690	0.830855	2.61588
	691	0.813418	2.69092
	692	0.799936	2.79067
	693	0.790054	2.91811
	694	0.785641	3.077
	695	0.784681	3.27141
	696	0.78719	3.50507
	697	0.790501	3.78187
	698	0.792819	4.10462
	699	0.790759	4.47566
	700	0.782249	4.89569
	701	0.766105	5.36173
	702	0.743081	5.86376
	703	0.714534	6.38087
	704	0.684862	6.88095
	705	0.655579	7.32356
	706	0.628023	7.66943
	707	0.602865	7.89223
	708	0.579782	7.98615
	709	0.558278	7.96351
	710	0.537913	7.84447
	711	0.518423	7.64794
	712	0.499706	7.38729
	713	0.481782	7.07665
	714	0.464823	6.73506
	715	0.449174	6.38733
	716	0.435312	6.05971
	717	0.423734	5.77414
	718	0.414831	5.54418
	719	0.408815	5.37347
	720	0.405686	5.25552
	721	0.403693	5.17427
	722	0.405413	5.10579
	723	0.408633	5.02195
	724	0.410375	4.89753
	725	0.414255	4.71663
	726	0.417678	4.47779
	727	0.420752	4.19301
	728	0.424099	3.8821
	729	0.428673	3.56583
	730	0.435499	3.26106
	731	0.441727	2.9788
	732	0.45545	2.72451
	733	0.473167	2.49945
	734	0.494671	2.30124
	735	0.519151	2.12871
	736	0.545033	1.97713
	737	0.569911	1.84248
	738	0.590734	1.72102
	739	0.60437	1.60969
	740	0.608451	1.50639
	741	0.602143	1.4099
	742	0.586431	1.31969
	743	0.563737	1.23569
	744	0.537125	1.15804
	745	0.509522	1.08689
	746	0.483237	1.02225
	747	0.459817	0.963937
	748	0.440149	0.911601
	749	0.424628	0.864788
	750	0.413341	0.840718
	751	0.406177	0.803547
	752	0.402885	0.770414
	753	0.403067	0.740889
	754	0.406107	0.714592
	755	0.411088	0.691192
	756	0.416717	0.670679
	757	0.420603	0.652273
	758	0.422586	0.636042
	759	0.420523	0.621818
	760	0.41384	0.609718
	761	0.402934	0.599127
	762	0.388971	0.590213
	763	0.373427	0.582913
	764	0.357657	0.577191
	765	0.342658	0.573031
	766	0.329028	0.570438
	767	0.317042	0.571888
	768	0.306757	0.572564
	769	0.298102	0.574978
	770	0.290945	0.579242
	771	0.285131	0.5855
	772	0.28051	0.593928
	773	0.276942	0.604737
	774	0.274308	0.618167
	775	0.272503	0.634485
	776	0.271445	0.653975
	777	0.271066	0.676919
	778	0.271312	0.703561
	779	0.272144	0.73404
	780	0.273535	0.768243
	781	0.275469	0.805593
	782	0.27794	0.844775
	783	0.279184	0.88353
	784	0.282767	0.918675
	785	0.286266	0.946601
	786	0.291062	0.964256
	787	0.297253	0.971692
	788	0.30346	0.96694
	789	0.3087	0.954269
	790	0.316621	0.937452
	791	0.325504	0.920112
	792	0.335407	0.905576
	793	0.346344	0.89449
	794	0.358242	0.888932
	795	0.370883	0.889203
	796	0.383845	0.895552
	797	0.396471	0.90811
	798	0.407915	0.927437
	799	0.417311	0.952866
[truncated: 432 more columns]

## Sheet: Figure 2-figure Supplement 1
	LC-MS/MS	data
