# Supplementary material for: Growth inhibitory factor/metallothionein-3 is a sulfane sulfur-binding protein
Source: eLife. 2025 Nov 14;12:RP92120. doi: 10.7554/eLife.92120 (PMC12618007; doi:10.7554/eLife.92120)
Supplement: Figure 3—figure supplement 2—source data 1. [file elife-92120-fig3-figsupp2-data1.xlsx]

## Sheet: Figure 3-figure supplement 2
	Figure 3-fiugre supplement 2
	A	sulfane sulfur		average	SD	n
			α-domain	0.819476	0.166403	3
			β-domain	0.522105	0.115054	3
	B	sulfane sulfur		average	SD	n
			MT3	19.4084	2.51497	3
			α-domain	6.92923	1	3
			β-domain	5.92764	0.296254	3
			βCys-to-Ala	8.19303	2.00317	3
			αCys-to-Ala	4.52263	0.528164	3
			Ser-to-Ala	22.5943	3.10417	3
		Zinc		average	SD	n
			MT3	7.36289	0.323319	3
			α-domain	4.7523	0.124787	3
			β-domain	4.01671	0.101477	3
			βCys-to-Ala	4.57055	0.0667915	3
			αCys-to-Ala	3.28717	0.133978	3
			Ser-to-Ala	7.22044	0.21343	3
