# Supplementary material for: Growth inhibitory factor/metallothionein-3 is a sulfane sulfur-binding protein
Source: eLife. 2025 Nov 14;12:RP92120. doi: 10.7554/eLife.92120 (PMC12618007; doi:10.7554/eLife.92120)
Supplement: Figure 3—source data 1. [file elife-92120-fig3-data1.xlsx]

## Sheet: Figure 3
	LC-MS/MS	source data
	Figure 3B
		HPE-IAM (mM)	average	SD	n
		1	2.30732	0.441318	3
		2.5	12.9666	4.44285	3
		5	16.886	4.88654	3
	Figure 3C	GIF/MT-3 (µM)	average	SD	n
		0	0	0	3
		1	18.0666	4.74007	3
		2.5	58.1401	9.0906	3
		5	107.99	28.2026	3
		10	168.86	48.8654	3
	Figure 3D
			average		SD
		Time (h)	37℃	60℃	37℃	60℃	n
		0.5	0.0376528	0.112888	0.00579274	0.00681116	3
		6	0.291051	2.48534	0.0569419	0.524575	3
		12	0.481448	4.87378	0.0522894	0.394772	3
		24	0.895042	12.6224	0.0215669	1.92056	3
		36	2.97474	19.5652	1.94734	1.47453	3
		48	2.55737	21.1154	0.655309	2.28613	3
	Figure 3E		average	SD	n
		MT-1	24.1962	6.45795	3
		MT-2	25.2173	5.67358	3
		GIF/MT-3	19.841	1.3	3
		GIF/MT-3 all C/A	0.3	0.1	3

## Sheet: Figure 3-figure supplement
Fig
