# Supplementary material for: Growth inhibitory factor/metallothionein-3 is a sulfane sulfur-binding protein
Source: eLife. 2025 Nov 14;12:RP92120. doi: 10.7554/eLife.92120 (PMC12618007; doi:10.7554/eLife.92120)
Supplement: Figure 4—source data 1. [file elife-92120-fig4-data1.xlsx]

## Sheet: Sheet1
	Figure 4A
		average				SD				n
	Time (h)	Cont	+Zn (20 µM)	+Zn (40 µM)		Cont	+Zn (20 µM)	+Zn (40 µM)		Cont	+Zn (20 µM)	+Zn (40 µM)
	0	16.2068	17.3131	16.3543		2.87731	2.26189	2.02442		3	3	3
	2	8.95398	11.7931	17.3774		2.37208	2.98637	0.713801		3	3	3
	6	6.17215	12.8176	18.1016		0.944245	2.60826	1.11922		3	3	3
	12	3.21878	15.1445	16.525		0.862981	2.20315	1.79445		3	3	3
	24	2.738	14.7885	19.8525		0.757891	0.693611	1.32878		3	3	3
	Figure 4B	average data
	TCEP (mM)	0	1	10	50	100
	SH group	1.04876	6.7129	9.75368	16.2568	18.4548
	Sulfane Sulfur	1.80068	3.91774	6.86571	15.3907	19.8701
		SD data
	TCEP (mM)	0	1	10	50	100
	SH group	0.511704	1.41249	0.945948	1.1944	1.05423
	Sulfane Sulfur	0.356799	0.977929	1.40359	2.27111	3.09067
		n
	TCEP (mM)	0	1	10	50	100
	SH group	3	3	3	3	3
	Sulfane Sulfur	3	3	3	3	3
