# Supplementary material for: Growth inhibitory factor/metallothionein-3 is a sulfane sulfur-binding protein
Source: eLife. 2025 Nov 14;12:RP92120. doi: 10.7554/eLife.92120 (PMC12618007; doi:10.7554/eLife.92120)
Supplement: Figure 5—source data 1. [file elife-92120-fig5-data1.xlsx]

## Sheet: Sheet1
	Figure 5A	average data
			oxNAC	NAC-S1	NAC-S2	oxNAC	NAC-S1	NAC-S2
		TCEP	−	−	−	+	+	+
		1 h	0	0	0	0	0	0.909593
		36 h	0	0	0.0978911	0	7.49259	16.9893
		SD
			oxNAC	NAC-S1	NAC-S2	oxNAC	NAC-S1	NAC-S2
		TCEP	−	−	−	+	+	+
		1 h	0	0	0	0	0	0.0830027
		36 h	0	0	0.0545871	0	1.06514	0.999905
		n
			oxNAC	NAC-S1	NAC-S2	oxNAC	NAC-S1	NAC-S2
		TCEP	−	−	−	+	+	+
		1 h	3	3	3	3	3	3
		36 h	3	3	3	3	3	3
	Figure 5B	average data
			DADS	DATS	DATetraS	DADS	DATS	DATetraS
		TCEP	−	−	−	+	+	+
		1 h	0	0	0	0	0.806056	1.97004
		36 h	0	0	1.03822	0	6.59998	16.5285
		SD
			DADS	DATS	DATetraS	DADS	DATS	DATetraS
		TCEP	−	−	−	+	+	+
		1 h	0	0	0	0	0.184052	0.324725
		36 h	0	0	0.563991	0	0.250338	3.13531
		n
			DADS	DATS	DATetraS	DADS	DATS	DATetraS
		TCEP	−	−	−	+	+	+
		1 h	3	3	3	3	3	3
		36 h	3	3	3	3	3	3
