# Supplementary material for: Growth inhibitory factor/metallothionein-3 is a sulfane sulfur-binding protein
Source: eLife. 2025 Nov 14;12:RP92120. doi: 10.7554/eLife.92120 (PMC12618007; doi:10.7554/eLife.92120)
Supplement: Figure 6—source data 1. [file elife-92120-fig6-data1.xlsx]

## Sheet: Sheet1
	Figure 6A	average data
			Control	H2O2		SNAP
		Conc. (mM)		1	5	1	5
			7.36872	3.90011	0.174875	5.65882	1.58713
		SD
			Control	H2O2		SNAP
		Conc. (mM)		1	5	1	5
			0.332805	0.428094	0.302893	0.514244	0.0662792
		n
			Control	H2O2		SNAP
		Conc. (mM)		1	5	1	5
			3	3	3	3	3
	Figure 6B	upper
		average data
			Control	H2O2		SNAP
		Conc. (mM)		1	5	1	5
		Control	18.8525	8.9071	0.273224	9.59016	0.68306
		TECP	14.8361	12.7596	14.4536	12.4863	10.2732
		SD
			Control	H2O2		SNAP
		Conc. (mM)		1	5	1	5
		Control	0.997174	1.08226	0.287859	0.714574	1.04112
		TECP	3.33658	2.56249	3.13768	2.28971	1.27071
		n
			Control	H2O2		SNAP
		Conc. (mM)		1	5	1	5
		Control	3	3	3	3	3
		TECP	3	3	3	3	3
	Figure 6B	lower
		average data
			Control	H2O2		SNAP
		Conc. (mM)		1	5	1	5
		Control	24.5689	9.5796	2.19413	15.4663	3.5166
		TECP	23.7783	22.3536	15.9595	18.2134	22.0017
		SD
			Control	H2O2		SNAP
		Conc. (mM)		1	5	1	5
		Control	5.29703	2.16651	0.404979	0.956127	0.625145
		TECP	1.70592	3.49548	1.92261	5.08701	1.38228
		n
			Control	H2O2		SNAP
		Conc. (mM)		1	5	1	5
		Control	3	3	3	3	3
		TECP	3	3	3	3	3
