# Supplementary material for: Growth inhibitory factor/metallothionein-3 is a sulfane sulfur-binding protein
Source: eLife. 2025 Nov 14;12:RP92120. doi: 10.7554/eLife.92120 (PMC12618007; doi:10.7554/eLife.92120)
Supplement: Figure 7—source data 1. [file elife-92120-fig7-data1.xlsx]

## Sheet: Sheet1
	Figure 7A	Sulfane sulfur data
		KCN	TCEP	average	SD	n
		-	-	21.098	4.6996	3
		+	-	5.17587	0.780098	3
		-	+	17.3902	1.83196	3
		+	+	8.16969	0.854427	3
	Figure 7B	Zinc data
		KCN	TCEP	Zn	average	SD	n
		-	-	-	7.60817	0.451092	3
		+	-	-	1.47905	0.715086	3
		-	+	-	5.68944	0.991716	3
		-	+	+	6.04769	0.77012	3
		+	+	-	1.3236	0.275549	3
		+	+	+	3.77091	0.716557	3
