# Supplementary material for: Growth inhibitory factor/metallothionein-3 is a sulfane sulfur-binding protein
Source: eLife. 2025 Nov 14;12:RP92120. doi: 10.7554/eLife.92120 (PMC12618007; doi:10.7554/eLife.92120)
Supplement: Figure 8—source data 1. [file elife-92120-fig8-data1.xlsx]

## Sheet: Sheet1
	Figure 8A	1/S	50	40	30.303	20	10	2.5	1
		1/V	0.914706	0.863889	0.706818	0.575926	0.485937	0.398718	0.38875
	Figure 8B	Log S (nM)	1.30103	1.39794	1.51851	1.69897	2	2.60206	3	3.30103	3.60206	4	4.69897
		apo-MT3	1.09325	1.15756	1.41479	1.73633	2.05788	2.50804	2.57235
		insulin							0.738152	1.06012	1.22186	1.41479	1.63924
	Figure 8C		Trx	Trx	Trp14	Trp32	Enzyme
		Time (min)	apo-MT-3	Zn7MT-3	apo-MT-3	apo-MT-3	Substrate
		0	0	0	0	0
		1	1.2508	0.0617284	0.0645161	0.0637959
		2	1.73235	0	0.0967742	0.0318979
		3	1.81372	0	0.0322581	0.127592
		4	1.95758	0.0308642	0.290323	0.15949
		5	1.91029	0.154321	0.225806	0.127592
		6	1.94304	0.0617284	0.193548	0.0956938
	Figure 8D	Trx	-	+
		average	2.04707	17.8966
		SD	0.420143	1.99124
		n	3	3
