# Supplementary material for: Growth inhibitory factor/metallothionein-3 is a sulfane sulfur-binding protein
Source: eLife. 2025 Nov 14;12:RP92120. doi: 10.7554/eLife.92120 (PMC12618007; doi:10.7554/eLife.92120)
Supplement: Figure 9—source data 2. [file elife-92120-fig9-data2.xlsx]

## Sheet: Figure 9
	Figure 9C	Upper
		Sulfane sulfur	Themostability
		0	-316.645
		1	-397.263
		2	-381.471
		3	-374.261
	Figure 9C	Lower
		Sulfane sulfur	Zinc binding affinity
		0	1.31463
		1	-125.503
		2	-109.369
		3	-55.9694
