# Supplementary material for: Growth inhibitory factor/metallothionein-3 is a sulfane sulfur-binding protein
Source: eLife. 2025 Nov 14;12:RP92120. doi: 10.7554/eLife.92120 (PMC12618007; doi:10.7554/eLife.92120)
Supplement: Figure 10—source data 2. [file elife-92120-fig10-data2.xlsx]

## Sheet: Sheet1
	Figure 10A					Figure 10B					Figure 10C
	Fraction number	Sulfane sulfur	Protein conc.			Fraction number	Sulfane sulfur	Protein conc.			Fraction number	Sulfane sulfur	Protein conc.
	1	0	0			1	3.74032	0			1	-3.96271	0
	2	0	0			2	1.3586	0			2	-5.6679	0.001875
	3	0	0			3	5.98824	0			3	30.8902	0.00734287
	4	0	0			4	5.44705	0			4	171.569	0.0398495
	5	18.2973	0.0487132			5	3.54866	0			5	24.1923	0.00859832
	6	190.606	1.01379			6	0	0			6	1.68756	0.0003125
	7	252.311	1.52849			7	1.35173	0			7	3.25352	0.0003125
	8	262.313	1.6296			8	3.69135	0			8	1.88402	0.0034375
	9	339.765	1.96967			9	2.06883	-0.00184162			9	-0.6291	0.001875
	10	446.994	2.12592			10	0	-0.00184162			10	-2.33774	0
	11	459.422	2.30974			11	3.5749	-0.00184162			11	-1.53949	0
	12	473.912	2.4568			12	0.517838	0.0441989			12	-1.53949	0
	13	414.812	2.88879			13	0	0			13	-3.13893	0
	14	431.456	2.79688			14	3.30382	0.0441989			14	-1.40138	0
	15	334.076	2.63143			15	0.0782088	0			15	-3.06369	0.0034375
	16	278.259	2.84283			16	-0.0303422	0			16	0.0389432	0.0059375
	17	165.416	1.97886			17	1.28105	0			17	1.88915	0.00375
	18	54.1257	0.627757			18	1.43542	0			18	0.584029	0.001875
	19	24.9565	0.324449			19	1.9837	0			19	0.379366	0.00125
	20	18.9834	0.214154			20	0	0			20	0.847286	0.0009375
	21	14.9953	0.149816			21	0	0.0257827
	22	12.8517	0.149816			22	0	0
	23	15.0843	0.10386			23	0	0
	24	10.8641	0.10386			24	6.16868	0.0810313
	25	1.02214	0.0946691			25	35.9193	0.394107
	26	18.9413	0.0854779			26	76.5356	1.18418
	27	13.9725	0.0579044			27	93.3016	1.3467
	28	2.27566	0.0670956			28	122.896	1.42254
	29	14.9218	0.0762868			29	110.631	1.17335
	30	5.42587	0.0579044			30	119.78	1.04334
	31	10.9452	0.00275735			31	97.438	0.891658
	32	9.46506	0.0211397			32	73.3835	0.71831
	33	13.2835	0			33	48.3778	0.642726
	34	14.1147	0.0119485			34	52.5084	0.486188
	35	53.0895	0.17739			35	50.3292	0.375691
	36	153.606	0.526654			36	51.3238	0.320442
	37	173.338	1.0046			37	32.1442	0.246777
	38	264.908	1.61121			38	29.8679	0.219153
	39	232.435	1.9329			39	30.9616	0.191529
	40	199.653	2.12592			40	37.4681	0.18232
	41	214.455	2.37714			41	40.5034	0.127072
	42	239.767	2.62016			42	49.7425	0.0902394
	43	357.06	2.53915			43	44.565	0.0165746
	44	333.227	2.47615			44	22.7126	0.00736648
	45	214.588	2.32313			45	6.93354	0
	46	185.765	2.32313			46	12.0879	0
	47	198.041	2.35014			47	7.99837	0.00736648
	48	165.263	2.25113			48	7.02007	-0.00184162
	49	131.047	1.92709			49	10.413	0
	50	91.9215	1.42304			50	15.2093	0.00736648
	51	88.9987	1			51	13.8385	0
	52	51.968	0.729973			52	8.97062	0.00736648
	53	24.5329	0.576958			53	0.882454	0
	54	30.4135	0.306931			54	11.3874	0.0349908
	55	22.2333	0.207921			55	8.48961	0
	56	10.2805	0.19892			56	13.5652	0
	57	15.7641	0.117912			57	3.50455	0
	58	10.4247	0.0909091			58	1.5324	0
	59	0	0.0729073			59	9.24565	0
	60	8.57825	0.0639064			60	0	0
	61	9.25001	0.0639064
	62	18.5679	0.0549055
	63	15.5341	0.0369037
	64	8.81326	0.0279028
	65	6.86667	0.0279028
	66	2.84975	0.117912
	67	0	0.00090009
	68	13.7308	0.0189019
	69	5.47801	0.00990099
	70	3.61863	0
